# Supplementary material for: Mechanically strong and tough hydrogels with pH-triggered self-healing and shape memory properties based on a dual physically crosslinked network
Source: Royal Society of Chemistry journal article supplement (doi:10.1039/c9py01862j), 2020-01-01
Supplement: c9py01862j1.pdf [file c9py01862j1.pdf]

## Supporting information

### **Mechanically strong and tough hydrogels with pH-triggered self-healing and shape memory property based on dual physically cross-linked network**

Tao Liu,<sup>a</sup> Shaoshuang Zou,<sup>b</sup> Chen Hang,<sup>a</sup> Jian Li,<sup>a</sup> Xiang Di,<sup>a</sup> Xiaohui Li,<sup>c</sup> Qiang Wu,<sup>a</sup> Fenfen Wang,<sup>a\*</sup>

Pingchuan Sun<sup>\*a,d</sup>

<sup>a</sup>Key Laboratory of Functional Polymer Materials of the Ministry of Education and College of Chemistry, Nankai University; Tianjin 300071, P. R. China

<sup>b</sup>College of Chemistry and Chemical Engineering, Qilu Normal University, Jinan, Shandong 250200, China

<sup>c</sup>School of Materials Science and Engineering, and Tianjin Key Laboratory of Composite and Functional Materials, Tianjin University, Tianjin 300072, China.

<sup>d</sup>State Key Laboratory of Medicinal Chemical Biology, Nankai University, Tianjin, 300071, P. R. China.

\*Corresponding Authors:

Fenfen Wang, Email: wff@mail.nankai.edu.cn

Pingchuan Sun, E-mail: spclbh@nankai.edu.cn

## Characterization.

Solution NMR experiments were performed on a Bruker AVANCE III NMR spectrometer with a proton resonance frequency of 400.13 MHz. The samples were dissolved in deuterated chloroform or DMSO with a small amount of TMS as the internal reference standard. The fourier transform infrared (FTIR) spectra were recorded with a A225/Q Platinum ATR unit on a Bruker Tensor II spectrometer equipped with a RT-DLaTGS detector, at a scan speed of 1.6 kHz, 16 scans per sample and a resolution of 4 cm<sup>-1</sup>. Ultraviolet spectra (UV, Shimadzu UV-2450 spectrophotometer).

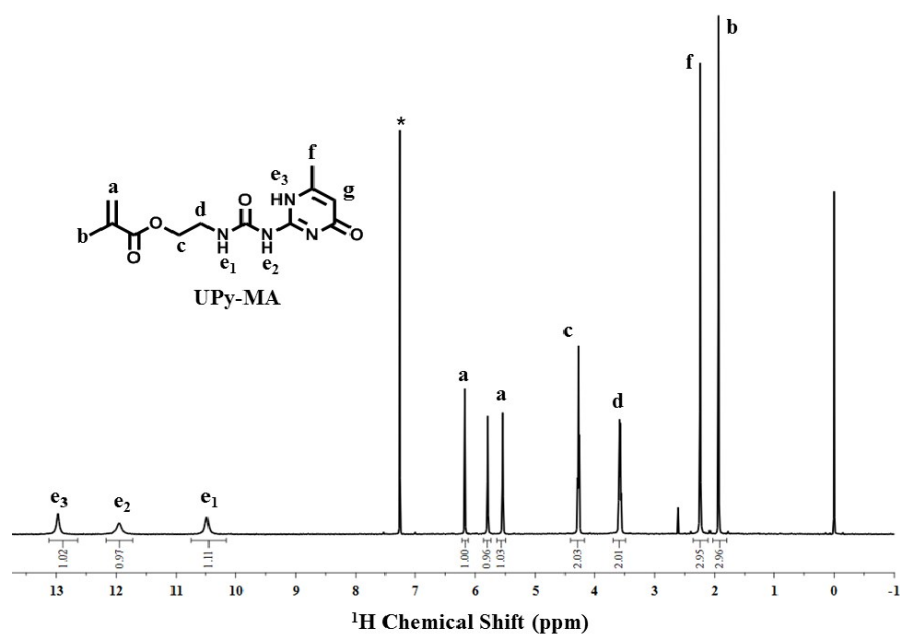

**Figure S1.** <sup>1</sup>H NMR spectrum of UPy-MA in CDCl<sub>3</sub>. “\*” indicates the proton signals of chloroform (δ<sub>iso</sub> = 7.26 ppm) and TMS (δ<sub>iso</sub> = 0 ppm). <sup>1</sup>H NMR (400 MHz, CDCl<sub>3</sub>, δ ppm): 1.94 (s, 3H, CH<sub>3</sub>), 2.24 (s, 3H, ArCH<sub>3</sub>), 3.56-3.60 (m, 2H, NHCH<sub>2</sub>), 4.26-4.29 (t, 2H, OCH<sub>2</sub>), 5.53-5.55 (m, 1H, C=CH<sub>2</sub>), 5.78 (s, 1H, aromatic ring), 6.18 (s, 1H, C=CH<sub>2</sub>), 10.49 (s, 1H, NH), 11.96 (s, 1H, NH), 12.97 (s, 1H, NH).

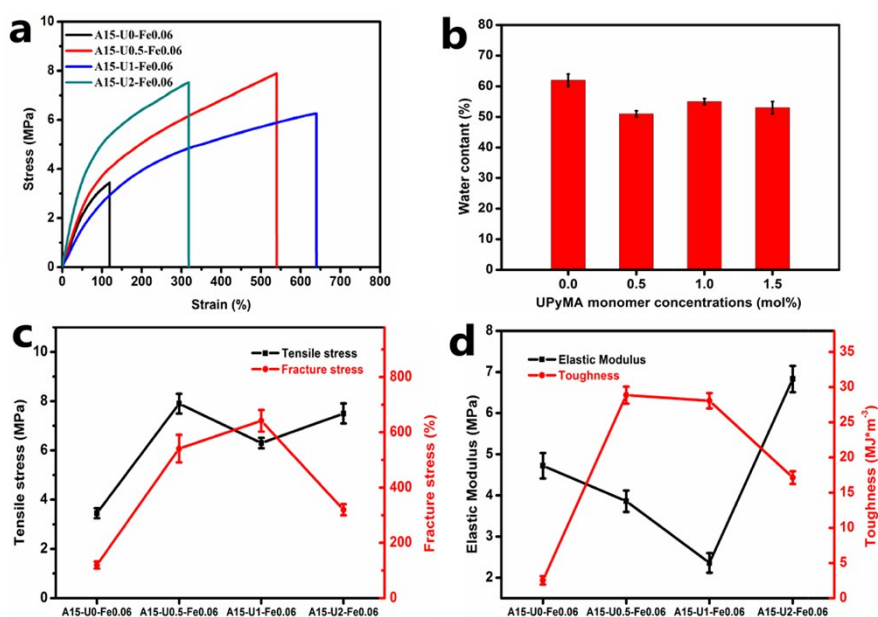

**Figure S2.** (a) Typical stress-strain profiles, (b) water contents, (c) tensile strength and elongation, and (d) elastic modulus and toughness of the D-hydrogels prepared with different UPyMA monomer concentrations. AM concentration =  $7 \text{ mol L}^{-1}$ , AA 15mol% of AM,  $\text{Fe}^{3+}$  concentration =  $0.06 \text{ mol L}^{-1}$ .

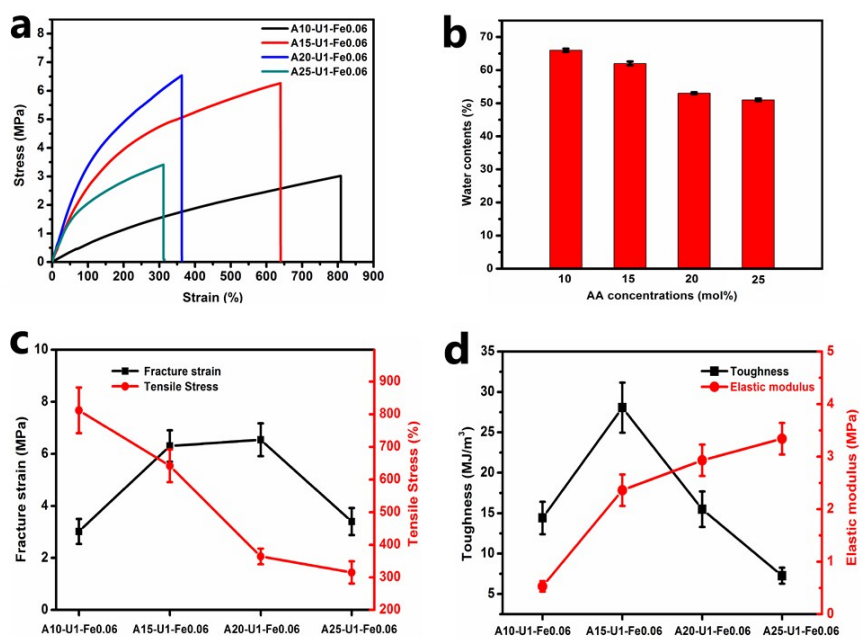

**Figure S3.** (a) Typical stress-strain profiles, (b) water contents, (c) tensile strength and elongation, and (d) elastic modulus and toughness of the D-hydrogels prepared with different AA concentrations. AM concentration =  $7 \text{ mol L}^{-1}$ , UPyMA 1mol% of AM,  $\text{Fe}^{3+}$  concentration =  $0.06 \text{ mol L}^{-1}$ .

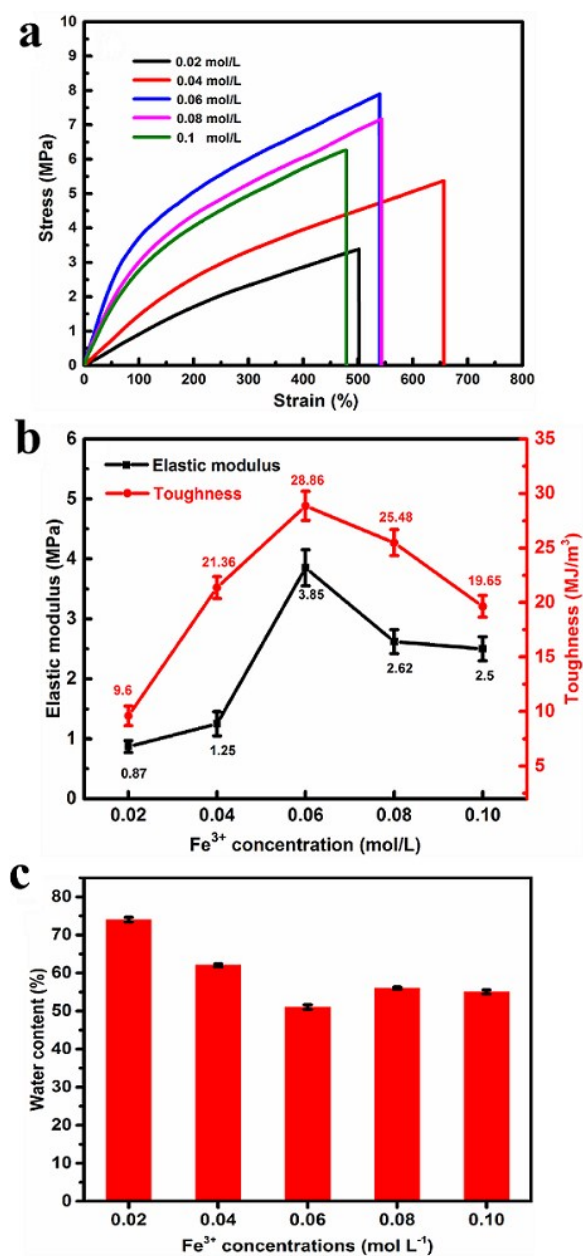

**Figure S4.** (a) Stress-strain profiles, (b) Elastic modulus and toughness and (c) water content of D-hydrogels at different  $\text{Fe}^{3+}$  concentrations. AM concentration = 7 mol L<sup>-1</sup>, AA (15% molar ratio of AM), and UPyMA (1% molar ratio of AM).

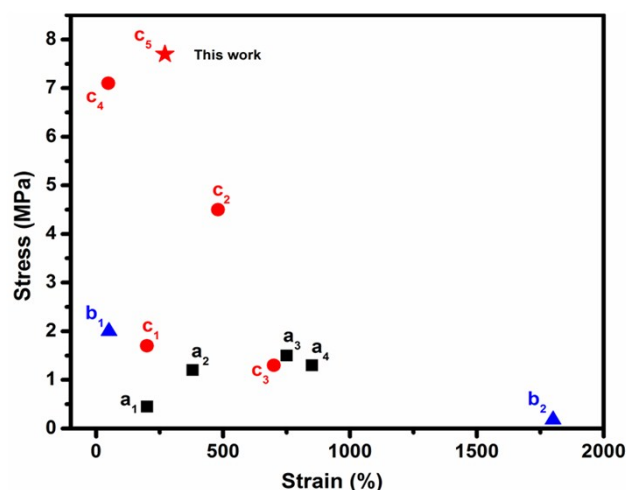

**Figure S5.** Comparison of the healing mechanical properties between the D-hydrogel and the previously reported self-healing hydrogel with the assistance of external stimuli, including **1)** heat,  $a_1$  biphasic synergistic gel materials (BSGs)<sup>1</sup>;  $a_2$  poly( N - acryloyl glycine) (PNAGA) physical hydrogel<sup>2</sup>;  $a_3$  poly(vinyl alcohol)- poly (3,4-ethylenedioxythio-phen) :polystyrene sulfonate (PVA-PEDOT:PSS) physical hydrogel<sup>3</sup>;  $a_4$  poly(acrylic acid)- cetyltrimethylammonium (PAA-CTA) physical hydrogel<sup>4</sup>; **2)** light irradiation,  $b_1$  poly(N-acryloyl 6-aminocaproic acid)- functionalized gold nanoparticles (PA6ACA-functionalized AuNPs) physical hydrogel<sup>5</sup>;  $b_2$  graphene oxide (GO)-hectorite clay-poly(N,N-dimethylacrylamide) (PDMAA) physical hydrogel<sup>6</sup>; **3)** pH triggering,  $c_1$  sodium alginate/poly(acrylamide – co-acrylic acid)/Fe<sup>3+</sup> (SA/P(AM-co-AA)/Fe<sup>3+</sup>) physical hydrogel<sup>7</sup>;  $c_2$  poly(acrylamide-co-acrylic acid)/Fe<sup>3+</sup> (P(AM-co-AA)/Fe<sup>3+</sup>)<sup>8</sup>;  $c_3$  poly(acrylamide- co-acrylic acid-co-2-Vinyl-4,6-Diamino-2-vinyl-1,3,5-triazine)/Fe<sup>3+</sup> ((PAM-co-AA- co-VDT)/Fe<sup>3+</sup>) physical hydrogel<sup>9</sup>;  $c_4$  P(AM-co-AA)/Na-Alginate/ Fe<sup>3+</sup> physical Hydrogels<sup>10</sup>;  $c_5$  PAM-co-AA-co-UPy-MA/ Fe<sup>3+</sup> physical hydrogel in this work.

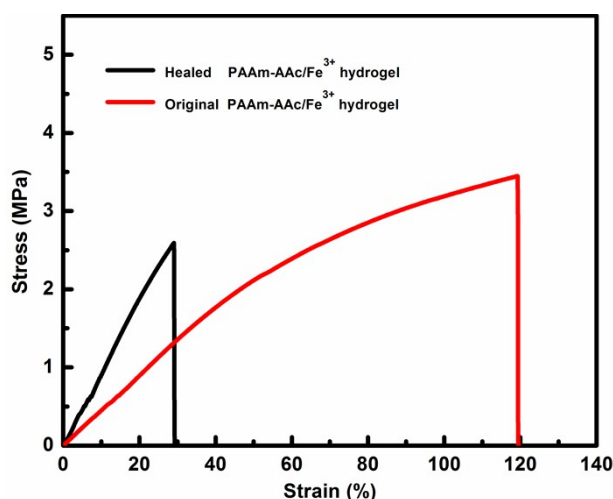

**Figure S6.** Stress–strain curves of the origin and healed D-hydrogel specimen A15-U0-Fe0.06 (the pristine PAM-AA/Fe<sup>3+</sup> hydrogel without UPy-monomer).

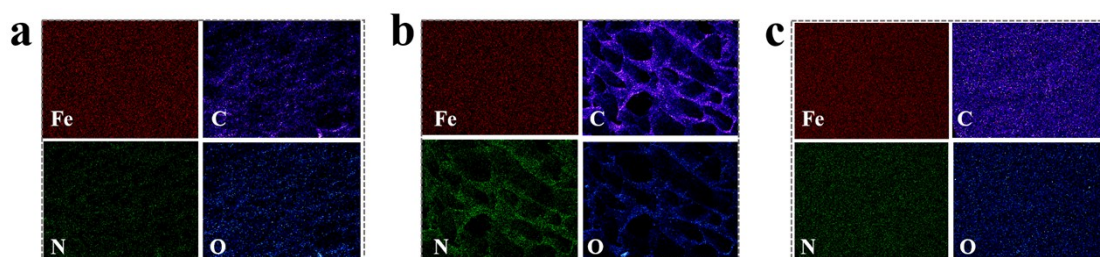

**Figure S7.** EDS images elemental maps for freeze-dried A15-U1-Fe0.06 hydrogel. (a) Original sample, (b) alkaline treatment sample, and (c) healed sample.

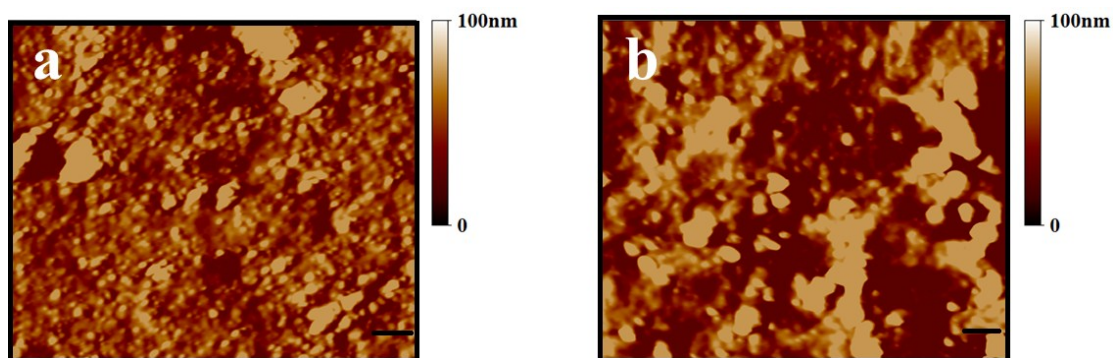

**Figure S8.** AFM images of freeze-dried A15-U0-Fe0.06 (a) and A15-U1-Fe0.06 (b) with scale bars of 1  $\mu\text{m}$ .

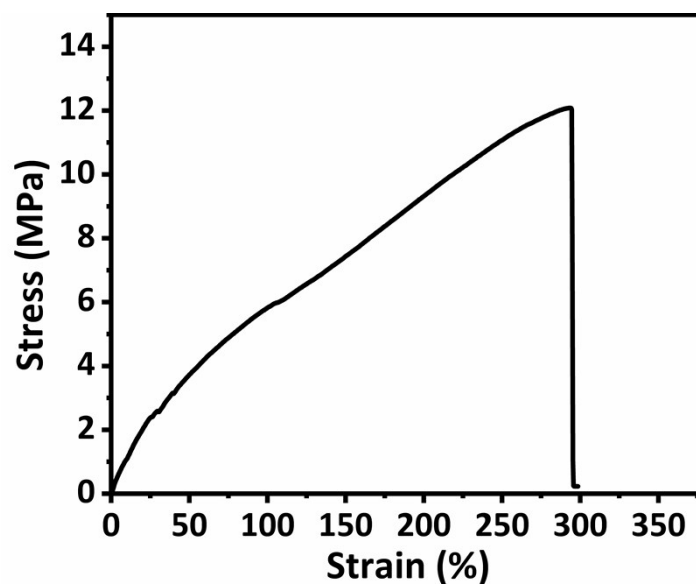

**Figure S9** Stress-strain curve of D-hydrogel treated in 0.06M  $\text{Fe}(\text{NO}_3)_3$  solution for 5 hours and then soaked in deionized water for 24 hours.

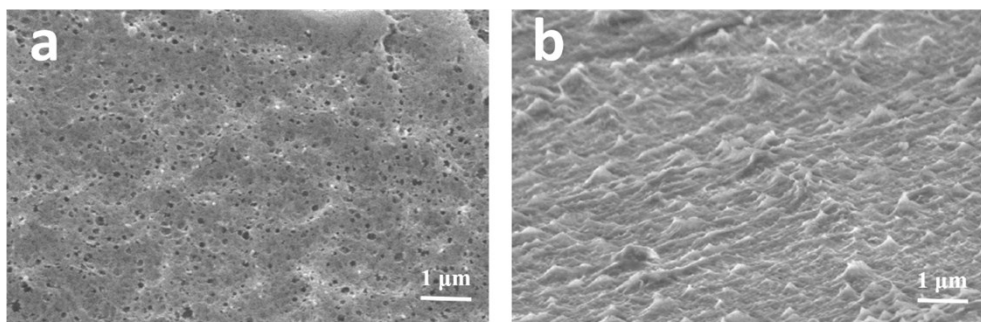

**Figure S10** SEM images of as-prepared S-hydrogel (a) and D-hydrogel (b)

**Table S1** Atomic content of main elements of S-hydrogel (A15-U1-Fe0.06) obtained from EDS

| Element | Atomic content (%) |
|---------|--------------------|
| C       | 64.04              |
| N       | 4.94               |
| O       | 24.30              |
| Fe      | 6.72               |

## References

1. Z. Zhao, Y. Liu, K. Zhang, S. Zhuo, R. Fang, J. Zhang, L. Jiang and M. Liu, *Angew. Chem., Int. Ed.*, 2017, **56**, 13464-13469.
2. X. Dai, Y. Zhang, L. Gao, T. Bai, W. Wang, Y. Cui and W. Liu, *Adv Mater*, 2015, **27**, 3566-3571.
3. Q. Rong, W. Lei, L. Chen, Y. Yin, J. Zhou and M. Liu, *Angew. Chem., Int. Ed.*, 2017, **56**, 14159-14163.
4. U. Gulyuz and O. Okay, *Macromolecules*, 2014, **47**, 6889-6899.
5. H. Zhang, D. Han, Q. Yan, D. Fortin, H. Xia and Y. Zhao, *J. Mater. Chem. A*, 2014, **2**, 13373-13379.
6. E. Zhang, T. Wang, L. Zhao, W. Sun, X. Liu and Z. Tong, *ACS Appl Mater Interfaces*, 2014, **6**, 22855-22861.
7. X. Li, H. Wang, D. Li, S. Long, G. Zhang and Z. Wu, *ACS Appl Mater Interfaces*, 2018, **10**, 31198-31207.
8. S. Y. Zheng, H. Ding, J. Qian, J. Yin, Z. L. Wu, Y. Song and Q. Zheng, *Macromolecules*, 2016, **49**, 9637-9646.
9. X. Li, R. Li, Z. Liu, X. Gao, S. Long and G. Zhang, *Macromol Rapid Commun*, 2018, **39**, 1800400.
10. Y. Liang, J. Xue, B. Du and J. Nie, *ACS Appl Mater Interfaces*, 2019, **11**, 5441-5454.
